# Supplementary material
Source: publisher figshare collection journal article supplement (https://karger.figshare.com/ndownloader/files/25452194)
Supplement: Supplementary file 1 [file 25452194]

**Suppl. Table S1.** Classification of proteins identified in the non-stimulated saliva of gastroesophageal reflux disease patients with (GE) and without (GNE) erosive tooth wear.

| Access  number | Protein name | GNE | GE |
| --- | --- | --- | --- |
| Q16875 | 6-phosphofructo-2-kinase/fructose-2_6-bisphosphatase 3(b, j, o, u) | - | Yes |
| P68032 | Actin_ alpha cardiac muscle 1(d, m, n, q, u, w) | Yes | Yes |
| P68133 | Actin_ alpha skeletal muscle(b, d, m, n, q, u, w) | Yes | Yes |
| P62736 | Actin_ aortic smooth muscle | Yes | Yes |
| P60709 | Actin_ cytoplasmic 1(b, m, n, q, u, w) | Yes | Yes |
| P63261 | Actin_ cytoplasmic 2(a, d, g, j, n, q, u, w) | Yes | Yes |
| P63267 | Actin_ gamma-enteric smooth muscle(b, d, m, n, q, u) | Yes | Yes |
| Q96PN6 | Adenylate cyclase type 10(c, m, s, u) | - | Yes |
| P12235 | ADP/ATP translocase 1(c, m, s, u) | - | Yes |
| P01009 | Alpha-1-antitrypsin(b, m, o, u) | Yes | - |
| P01023 | Alpha-2-macroglobulin(b, m, o, u) | Yes | - |
| P04745 | Alpha-amylase 1(a, g, o, u) | Yes | Yes |
| P19961 | Alpha-amylase 2B(a, g, o, u) | Yes | Yes |
| P06733 | Alpha-enolase(a, b, g, n, p, s, u, w) | - | Yes |
| P02647 | Apolipoprotein A-I(c,g,o,u,w) | Yes | - |
| Q96NN9 | Apoptosis-inducing factor 3(c,g,o,u,w) | - | Yes |
| Q9P2R6 | Arginine-glutamic acid dipeptide repeats protein(b, m, r, u) | - | Yes |
| Q68CP9 | AT-rich interactive domain-containing protein 2(b, m, r, u) | - | Yes |
| P20273 | B-cell receptor CD22(b, m, s, u, x) | - | Yes |
| Q562R1 | Beta-actin-like protein 2 (b, m, s, u, x) | Yes | Yes |
| P13929 | Beta-enolase(a, g, n, u) | - | Yes |
| Q96DR5 | BPI fold-containing family A member 2(b, m, o, u) | - | Yes |
| Q12791 | Calcium-activated potassium channel subunit alpha-1(e, m, r, u) | - | Yes |
| P23280 | Carbonic anhydrase 6(a, g, o, u) | - | Yes |
| P48730 | Casein kinase I isoform delta(b, m, o, u) | - | Yes |
| P35221 | Catenin alpha-1(b, m, q, u) | - | Yes |
| Q02224 | Centromere-associated protein E(b, m, q, u) | Yes | - |
| Q9BV73 | Centrosome-associated protein CEP250(b, m, q, u) | - | Yes |
| Q9UKF6 | Cleavage and polyadenylation specificity factor subunit 3(b, m, t, x) | - | Yes |
| Q7Z460 | CLIP-associating protein 1(b, m, q, u) | - | Yes |
| P04080 | Cystatin-B(a, g, n, p, u) | Yes | Yes |
| P01034 | Cystatin-C(b, i, o, u) | - | Yes |
| P01036 | Cystatin-S(a, b, g, o, u) | Yes | Yes |
| P09228 | Cystatin-SA(a, b, g, o, u) | Yes | Yes |
| P01037 | Cystatin-SN(a, b, g, o, u) | Yes | Yes |
| Q96HP0 | Dedicator of cytokinesis protein 6(b, m, t, u) | - | Yes |
| Q8NF50 | Dedicator of cytokinesis protein 8(b, m, t, u) | - | Yes |
| Q9Y4D1 | Disheveled-associated activator of morphogenesis 1(b, m, q, u) | - | Yes |
| P78527 | DNA-dependent protein kinase catalytic subunit(b, m, r, u) | - | Yes |
| P49792 | E3 SUMO-protein ligase RanBP2(b, m, r, u) | - | Yes |
| Q5VTR2 | E3 ubiquitin-protein ligase BRE1A(b, m, r, u) | - | Yes |
| B1AJZ9 | Forkhead-associated domain-containing protein 1(b, m, t, u) | - | Yes |
| P09104 | Gamma-enolase(b, m, t, u) | - | Yes |
| Q14687 | Genetic suppressor element 1(b, m, t, u, w) | - | Yes |
| Q8N2G8 | GH3 domain-containing protein(b, m, r, u) | - | Yes |
| P14136 | Glial fibrillary acidic protein(e, m, t, u) | - | Yes |
| Q13439 | Golgin subfamily A member 4(f, m, s, u) | Yes | - |
| Q86YR5 | G-protein-signaling modulator 1(b, m, r, u) | - | Yes |
| P81274 | G-protein-signaling modulator 2(b, m, r, u) |  | Yes |
| P00738 | Haptoglobin(b, m, o, u) | Yes | Yes |
| P00739 | Haptoglobin-related protein(b, m, o, u) | Yes | Yes |
| Q9UJY1 | Heat shock protein beta-8(b, m, t, u) | - | Yes |
| Q8NDA2 | Hemicentin-2(b, m, o, u) | - | Yes |
| P69905 | Hemoglobin subunit alpha(b, c, k, l, n, o, s, u) | Yes | Yes |
| P68871 | Hemoglobin subunit beta(b, c, k, l, n, o, u, w) | Yes | Yes |
| P02042 | Hemoglobin subunit delta(b, c, k, l, o, u) | Yes | Yes |
| P02100 | Hemoglobin subunit epsilon(b, c, k, l, o, u) | Yes | Yes |
| P69891 | Hemoglobin subunit gamma-1(b, c, k, l, o, u) | Yes | Yes |
| P69892 | Hemoglobin subunit gamma-2(b, c, k, l, o, u) | Yes | Yes |
| P02790 | Hemopexin(b, m, r, u) | Yes | - |
| Q8IZT8 | Heparan sulfate glucosamine 3-O-sulfotransferase 5(b, m, r, u) | - | Yes |
| P15516 | Histatin-3(b, i, l, o, u) | Yes | Yes |
| Q96A08 | Histone H2B type 1-A(b, m, r, u) | - | Yes |
| P33778 | Histone H2B type 1-B(b, m, r, u) | - | Yes |
| P62807 | Histone H2B type 1-C/E/F/G/I(b, m, r, u) | - | Yes |
| P58876 | Histone H2B type 1-D(b, m, r, u) | - | Yes |
| Q93079 | Histone H2B type 1-H(b, m, r, u) | - | Yes |
| P06899 | Histone H2B type 1-J(b, m, r, u) | - | Yes |
| O60814 | Histone H2B type 1-K(b, m, r, u) | - | Yes |
| Q99880 | Histone H2B type 1-L(b, m, r, u) | - | Yes |
| Q99879 | Histone H2B type 1-M(b, m, r, u) | - | Yes |
| Q99877 | Histone H2B type 1-N(b, m, r, u) | - | Yes |
| P23527 | Histone H2B type 1-O(b, m, r, u) | - | Yes |
| Q16778 | Histone H2B type 2-E(b, m, r, u) | - | Yes |
| Q5QNW6 | Histone H2B type 2-F(b, m, r, u) | - | Yes |
| Q8N257 | Histone H2B type 3-B(b, m, r, u) | - | Yes |
| P57053 | Histone H2B type F-S(b, m, r, u) | - | Yes |
| Q96S86 | Hyaluronan and proteoglycan link protein 3(b, m, o, u) | - | Yes |
| Q4G0P3 | Hydrocephalus-inducing protein homolog(b, m, o, u) | Yes | - |
| P01876 | Immunoglobulin heavy constant alpha 1(b, j, o, u) | Yes | Yes |
| P01877 | Immunoglobulin heavy constant alpha 2(b, j, o, u) | Yes | Yes |
| P01857 | Immunoglobulin heavy constant gamma 1(b, j, o, u) | Yes | - |
| P01859 | Immunoglobulin heavy constant gamma 2(b, j, o, u) | Yes | - |
| P01860 | Immunoglobulin heavy constant gamma 3(b, j, o, u) | Yes | - |
| P01861 | Immunoglobulin heavy constant gamma 4(b, j, o, u) | Yes | - |
| P01591 | Immunoglobulin J chain(b, j, o, u) | Yes | Yes |
| Q6PEW0 | Inactive serine protease 54(b, m, o, u) | - | Yes |
| P05112 | Interleukin-4(a, m, o, u) | - | Yes |
| P13645 | Keratin_ type I cytoskeletal 10(f, m, o, q, u) | Yes | Yes |
| P13646 | Keratin_ type I cytoskeletal 13(f, m, o, q, u) | Yes | Yes |
| P19013 | Keratin_ type II cytoskeletal 4(f, m, o, q, u) | Yes | Yes |
| P13647 | Keratin_ type II cytoskeletal 5(f, m, o, q, u) | Yes | - |
| P02538 | Keratin_ type II cytoskeletal 6A(f, m, o, q, u) | Yes | Yes |
| P04259 | Keratin_ type II cytoskeletal 6B(f, m, o, q, u) | Yes | Yes |
| P48668 | Keratin_ type II cytoskeletal 6C(f, m, o, q, u) | Yes | Yes |
| P22079 | Lactoperoxidase(b, m, o, u) | Yes | Yes |
| P02788 | Lactotransferrin(b, i, o, u) | Yes | Yes |
| Q16363 | Laminin subunit alpha-4(b, m, o, u) | - | Yes |
| Q96JM7 | Lethal(3)malignant brain tumor-like protein 3(b, m, p, u) | - | Yes |
| P31025 | Lipocalin-1(b, m, o, u) | Yes | Yes |
| P61626 | Lysozyme C(a, b, g, i, j, o, u, w) | Yes | Yes |
| Q9Y3C7 | Mediator of RNA polymerase II transcription subunit 31(b, m, p, u) | - | Yes |
| Q9BUR5 | MICOS complex subunit MIC26(b, m, o, u) | - | Yes |
| P27816 | Microtubule-associated protein 4(m,n,q,u,) | - | Yes |
| O15021 | Microtubule-associated serine/threonine-protein kinase 4(b, m, t, u) | - | Yes |
| Q8IVH8 | Mitogen-activated protein kinase kinase kinase kinase 3(b, m, t, u) | - | Yes |
| Q8TAX7 | Mucin-7(b, i, k, o, u) | Yes | Yes |
| O75161 | Nephrocystin-4(b, m, p, q, u) | Yes | - |
| P59665 | Neutrophil defensin 1(b, i, j, o, u) | Yes | Yes |
| P59666 | Neutrophil defensin 3(b, i, j, o, u) | Yes | Yes |
| Q8N1F7 | Nuclear pore complex protein Nup93(b, m, p, u) | - | Yes |
| P04746 | Pancreatic alpha-amylase(a, g, o, u) | Yes | Yes |
| Q9H307 | Pinin(b, m, p, u) | - | Yes |
| Q15149 | Plectin(b, m, q, u) | - | Yes |
| Q460N5 | Poly [ADP-ribose] polymerase 14(b, m, p, u) | - | Yes |
| Q8IXQ6 | Poly [ADP-ribose] polymerase 9(b, m, p, u) | - | Yes |
| P01833 | Polymeric immunoglobulin receptor(b, m, o, u) | Yes | Yes |
| Q6S8J3 | POTE ankyrin domain family member E(f, m, n, u) | Yes | Yes |
| A5A3E0 | POTE ankyrin domain family member F(f, m, n, u) | Yes | Yes |
| P0CG38 | POTE ankyrin domain family member I(f, m, n, u) | Yes | Yes |
| P0CG39 | POTE ankyrin domain family member J(f, m, n, u) | Yes | Yes |
| O75400 | Pre-mRNA-processing factor 40 homolog A(b, m, p, u) | - | Yes |
| Q6P2Q9 | Pre-mRNA-processing-splicing factor 8(b, m, p, u) | - | Yes |
| Q96G01 | Protein bicaudal D homolog 1(b, m, r, u) | - | Yes |
| E2RYF7 | Protein PBMUCL2(b, m, o, u) | - | Yes |
| Q96AA3 | Protein RFT1 homolog(a, m, s, u) | - | Yes |
| Q14690 | Protein RRP5 homolog(b, m, p, u) | - | Yes |
| Q14289 | Protein-tyrosine kinase 2-beta(f, m, r, u) | - | Yes |
| Q5VSP4 | Putative lipocalin 1-like protein 1(b, m, t, x) | Yes | Yes |
| P0C866 | Putative uncharacterized protein encoded by LINC00869(b, m, t, x) | - | Yes |
| Q99666 | RANBP2-like and GRIP domain-containing protein 5/6(e, m, r, u) | - | Yes |
| O14715 | RANBP2-like and GRIP domain-containing protein 8(e, m, r, u) | - | Yes |
| Q15256 | Receptor-type tyrosine-protein phosphatase R(b, m, r, u) | - | Yes |
| P23921 | Ribonucleoside-diphosphate reductase large subunit(b, m, s, u) | - | Yes |
| Q9BWF3 | RNA-binding protein 4(b, m, t, u) | - | Yes |
| Q9BQ04 | RNA-binding protein 4B(a, m, r, u) | - | Yes |
| P02810 | Salivary acidic proline-rich phosphoprotein 1/2(b, g, o, u) | - | Yes |
| Q9NQ38 | Serine protease inhibitor Kazal-type 5(b, m, o, u) | - | Yes |
| Q9BXU1 | Serine/threonine-protein kinase 31(b, m, r, u) | - | Yes |
| P02787 | Serotransferrin(b, m, t, u) | Yes | Yes |
| P02768 | Serum albumin(a, b, c, g, o, u, w) | Yes | Yes |
| Q6ICB4 | Sesquipedalian-2(b, m, r, u) | - | Yes |
| Q5T5P2 | Sickle tail protein homolog(b, m, t, u) | - | Yes |
| Q15465 | Sonic hedgehog protein(b, m, s, u) | - | Yes |
| Q9BXN6 | Sperm protein associated with the nucleus on the X chromosome D(b, m, n, u) | - | Yes |
| Q8WXA9 | Splicing regulatory glutamine/lysine-rich protein 1(b, m, r, u) | - | Yes |
| P02814 | Submaxillary gland androgen-regulated protein 3B(b, m, o, u) | - | Yes |
| Q969V4 | Tektin-1(d, m, q, u) | - | Yes |
| Q86TV6 | Tetratricopeptide repeat protein 7B(b, m, t, u) | - | Yes |
| Q14956 | Transmembrane glycoprotein NMB(b, m, r, u) | - | Yes |
| Q6NUQ4 | Transmembrane protein 214(b, m, r, u) | - | Yes |
| O94782 | Ubiquitin carboxyl-terminal hydrolase 1(f, m, r, u) | - | Yes |
| A0A087WZY1 | Uncharacterized protein(b, m, t, w, x) | - | Yes |
| Q9Y4I1 | Unconventional myosin-Va(b, m, o, q, u) | - | Yes |
| Q9ULV0 | Unconventional myosin-Vb(b, m, t, u) | - | Yes |
| Q9NQX4 | Unconventional myosin-Vc(b, m, o, q, u) | - | Yes |
| Q5THJ4 | Vacuolar protein sorting-associated protein 13D(b, m, t, u) | - | Yes |
| O75362 | Zinc finger protein 217(b, m, r, u) | - | Yes |
| Q9NYT6 | Zinc finger protein 226(b, m, r, u) | - | Yes |
| Q8N7K0 | Zinc finger protein 433(b, m, r, u) | - | Yes |
| Q9HAH1 | Zinc finger protein 556(b, m, r, u) | - | Yes |
| P25311 | Zinc-alpha-2-glycoprotein(b, m, r, u) | - | Yes |

Proteins were classified according to: **General Function**: a) metabolism; b) biological process; c) transport; d) structure and structural organization; e) information pathways; f) miscellanea; **Function in AEP**: g) metabolism; h) tissue regeneration; i) antimicrobial; j) immune response; k) lubrication; l) biomineralization; m) unknown biological function; **Origin**: n) cytoplasm origin; o) extracellular origin; p) nucleus origin; q) cytoskeleton origin; r) intracellular origin; s) membrane origin; t) unknown protein origin; Interaction: u) protein/protein interaction; v) calcium/phosphate binding; w) other molecular interaction; x) unknown molecular interaction.

**Supplementary Table S2.** Proteins differentially expressed in the non-stimulated saliva of gastroesophageal reflux disease patients with (GE) and without (GNE) erosive tooth wear.

| **aAccession Number** | **Protein Name** | **PLGS**  **Score** | **b Ratio GNE:GE** |
| --- | --- | --- | --- |
| **P69905** | Hemoglobin subunit alpha | 175 | **22.65** |
| **P02768** | Serum albumin | 971 | **4.53** |
| **P19013** | Keratin_ type II cytoskeletal 4 | 49 | **3.86** |
| **P02538** | Keratin_ type II cytoskeletal 6A | 57 | **3.19** |
| **P04259** | Keratin_ type II cytoskeletal 6B | 57 | **3.16** |
| **P68871** | Hemoglobin subunit beta | 162 | **2.72** |
| **P02100** | Hemoglobin subunit epsilon | 162 | **2.48** |
| **P02042** | Hemoglobin subunit delta | 162 | **2.46** |
| **P69891** | Hemoglobin subunit gamma-1 | 162 | **2.34** |
| **P69892** | Hemoglobin subunit gamma-2 | 162 | **2.32** |
| **Q8TAX7** | Mucin-7 | 80 | 1.28 |
| **P01877** | Immunoglobulin heavy constant alpha 2 | 297 | 0.94 |
| **P19961** | Alpha-amylase 2B | 28 | 0.79 |
| **P04745** | Alpha-amylase 1 | 360 | 0.77 |
| **P01037** | Cystatin-SN | 1635 | 0.76 |
| **P09228** | Cystatin-SA | 1379 | 0.62 |
| **P61626** | Lysozyme C | 560 | **0.45** |
| **P01009** | Alpha-1-antitrypsin | 50 | GNEc |
| **P01023** | Alpha-2-macroglobulin | 20 | GNE |
| **P02647** | Apolipoprotein A-I | 49 | GNE |
| **Q02224** | CentromeGE-associated protein E | 14 | GNE |
| **Q13439** | Golgin subfamily A member 4 | 46 | GNE |
| **P02790** | Hemopexin | 19 | GNE |
| **Q4G0P3** | Hydrocephalus-inducing protein homolog | 8 | GNE |
| **P01857** | Immunoglobulin heavy constant gamma 1 | 56 | GNE |
| **P01859** | Immunoglobulin heavy constant gamma 2 | 56 | GNE |
| **P01860** | Immunoglobulin heavy constant gamma 3 | 56 | GNE |
| **P01861** | Immunoglobulin heavy constant gamma 4 | 56 | GNE |
| **P13647** | Keratin_ type II cytoskeletal 5 | 75 | GNE |
| **O75161** | Nephrocystin-4 | 13 | GNE |
| **Q16875** | 6-phosphofructo-2-kinase/fructose-2_6-bisphosphatase 3 | 104 | GEd |
| **Q96PN6** | Adenylate cyclase type 10 | 26 | GE |
| **P12235** | ADP/ATP translocase 1 | 64 | GE |
| **P06733** | Alpha-enolase | 185 | GE |
| **Q96NN9** | Apoptosis-inducing factor 3 | 39 | GE |
| **Q9P2R6** | Arginine-glutamic acid dipeptide GEpeats protein | 96 | GE |
| **Q68CP9** | AT-rich interactive domain-containing protein 2 | 152 | GE |
| **P20273** | B-cell GEceptor CD22 | 79 | GE |
| **P13929** | Beta-enolase | 157 | GE |
| **Q96DR5** | BPI fold-containing family A member 2 | 137 | GE |
| **Q12791** | Calcium-activated potassium channel subunit alpha-1 | 79 | GE |
| **P23280** | Carbonic anhydrase 6 | 341 | GE |
| **P48730** | Casein kinase I isoform delta | 73 | GE |
| **P35221** | Catenin alpha-1 | 78 | GE |
| **Q9BV73** | Centrosome-associated protein CEP250 | 263 | GE |
| **Q9UKF6** | Cleavage and polyadenylation specificity factor subunit 3 | 101 | GE |
| **Q7Z460** | CLIP-associating protein 1 | 75 | GE |
| **P01034** | Cystatin-C | 73 | GE |
| **Q96HP0** | Dedicator of cytokinesis protein 6 | 94 | GE |
| **Q8NF50** | Dedicator of cytokinesis protein 8 | 129 | GE |
| **Q9Y4D1** | Disheveled-associated activator of morphogenesis 1 | 108 | GE |
| **P78527** | DNA-dependent protein kinase catalytic subunit | 76 | GE |
| **P49792** | E3 SUMO-protein ligase RanBP2 | 138 | GE |
| **Q5VTR2** | E3 ubiquitin-protein ligase BGE1A | 73 | GE |
| **B1AJZ9** | Forkhead-associated domain-containing protein 1 | 68 | GE |
| **P09104** | Gamma-enolase | 157 | GE |
| **Q14687** | Genetic suppGEssor element 1 | 93 | GE |
| **Q8N2G8** | GH3 domain-containing protein | 162 | GE |
| **P14136** | Glial fibrillary acidic protein | 56 | GE |
| **Q86YR5** | G-protein-signaling modulator 1 | 233 | GE |
| **P81274** | G-protein-signaling modulator 2 | 218 | GE |
| **Q9UJY1** | Heat shock protein beta-8 | 135 | GE |
| **Q8NDA2** | Hemicentin-2 | 66 | GE |
| **Q8IZT8** | Heparan sulfate glucosamine 3-O-sulfotransferase 5 | 73 | GE |
| **Q96A08** | Histone H2B type 1-A | 598 | GE |
| **P33778** | Histone H2B type 1-B | 593 | GE |
| **P62807** | Histone H2B type 1-C/E/F/G/I | 593 | GE |
| **P58876** | Histone H2B type 1-D | 593 | GE |
| **Q93079** | Histone H2B type 1-H | 593 | GE |
| **P06899** | Histone H2B type 1-J | 593 | GE |
| **O60814** | Histone H2B type 1-K | 593 | GE |
| **Q99880** | Histone H2B type 1-L | 593 | GE |
| **Q99879** | Histone H2B type 1-M | 593 | GE |
| **Q99877** | Histone H2B type 1-N | 593 | GE |
| **P23527** | Histone H2B type 1-O | 593 | GE |
| **Q16778** | Histone H2B type 2-E | 593 | GE |
| **Q5QNW6** | Histone H2B type 2-F | 593 | GE |
| **Q8N257** | Histone H2B type 3-B | 593 | GE |
| **P57053** | Histone H2B type F-S | 593 | GE |
| **Q96S86** | Hyaluronan and proteoglycan link protein 3 | 81 | GE |
| **Q6PEW0** | Inactive serine protease 54 | 95 | GE |
| **P05112** | Interleukin-4 | 72 | GE |
| **Q16363** | Laminin subunit alpha-4 | 34 | GE |
| **Q96JM7** | Lethal(3)malignant brain tumor-like protein 3 | 56 | GE |
| **Q9Y3C7** | Mediator of RNA polymerase II transcription subunit 31 | 83 | GE |
| **Q9BUR5** | MICOS complex subunit MIC26 | 76 | GE |
| **P27816** | Microtubule-associated protein 4 | 152 | GE |
| **O15021** | Microtubule-associated serine/thGEonine-protein kinase 4 | 163 | GE |
| **Q8IVH8** | Mitogen-activated protein kinase kinase kinase kinase 3 | 125 | GE |
| **Q8N1F7** | Nuclear poGE complex protein Nup93 | 82 | GE |
| **Q9H307** | Pinin | 96 | GE |
| **Q15149** | Plectin | 23 | GE |
| **Q460N5** | Poly [ADP-ribose] polymerase 14 | 134 | GE |
|  | Poly [ADP-ribose] polymerase 9 | 65 | GE |
| **O75400** | PGE-mRNA-processing factor 40 homolog A | 59 | GE |
| **Q6P2Q9** | PGE-mRNA-processing-splicing factor 8 | 79 | GE |
| **Q96G01** | Protein bicaudal D homolog 1 | 391 | GE |
| **E2RYF7** | Protein PBMUCL2 | 56 | GE |
| **Q96AA3** | Protein RFT1 homolog | 69 | GE |
| **Q14690** | Protein RRP5 homolog | 47 | GE |
| **Q14289** | Protein-tyrosine kinase 2-beta | 155 | GE |
| **P0C866** | Putative uncharacterized protein encoded by LINC00869 | 62 | GE |
| **Q99666** | RANBP2-like and GRIP domain-containing protein 5/6 | 185 | GE |
| **O14715** | RANBP2-like and GRIP domain-containing protein 8 | 182 | GE |
| **Q15256** | GEceptor-type tyrosine-protein phosphatase R | 176 | GE |
| **P23921** | Ribonucleoside-diphosphate GEductase large subunit | 127 | GE |
| **Q9BWF3** | RNA-binding protein 4 | 104 | GE |
| **Q9BQ04** | RNA-binding protein 4B | 126 | GE |
| **P02810** | Salivary acidic proline-rich phosphoprotein 1/2 | 157 | GE |
| **Q9NQ38** | Serine protease inhibitor Kazal-type 5 | 24 | GE |
| **Q9BXU1** | Serine/thGEonine-protein kinase 31 | 224 | GE |
| **Q6ICB4** | Sesquipedalian-2 | 163 | GE |
| **Q5T5P2** | Sickle tail protein homolog | 70 | GE |
| **Q15465** | Sonic hedgehog protein | 71 | GE |
| **Q9BXN6** | Sperm protein associated with the nucleus on the X chromosome D | 143 | GE |
| **Q8WXA9** | Splicing GEgulatory glutamine/lysine-rich protein 1 | 107 | GE |
| **P02814** | Submaxillary gland androgen-GEgulated protein 3B | 934 | GE |
| **Q969V4** | Tektin-1 | 40 | GE |
| **Q86TV6** | Tetratricopeptide GEpeat protein 7B | 45 | GE |
| **Q14956** | Transmembrane glycoprotein NMB | 69 | GE |
| **Q6NUQ4** | Transmembrane protein 214 | 84 | GE |
| **O94782** | Ubiquitin carboxyl-terminal hydrolase 1 | 209 | GE |
| **A0A087WZY1** | Uncharacterized protein | 157 | GE |
| **Q9Y4I1** | Unconventional myosin-Va | 88 | GE |
| **Q9ULV0** | Unconventional myosin-Vb | 100 | GE |
| **Q9NQX4** | Unconventional myosin-Vc | 88 | GE |
| **Q5THJ4** | Vacuolar protein sorting-associated protein 13D | 77 | GE |
| **O75362** | Zinc finger protein 217 | 83 | GE |
| **Q9NYT6** | Zinc finger protein 226 | 84 | GE |
| **Q8N7K0** | Zinc finger protein 433 | 324 | GE |
| **Q9HAH1** | Zinc finger protein 556 | 61 | GE |
| **P25311** | Zinc-alpha-2-glycoprotein | 459 | GE |

a Identification is based on proteins ID from Uniprot protein database, reviewed only (http://www.uniprot.org/).

b Proteins with expression significantly altered are organized according to the ratio.

c Indicates proteins found exclusively in the saliva of GNE patients (in alphabetical order).

d Indicates proteins found exclusively in the saliva of GE patients (in alphabetical order).

Ratios highlighted in bold indicate proteins with increase or decrease higher than 2-fold in GNE compared with GE patients.
